# Supplementary material for: Dapsone for Refractory Gastrointestinal Symptoms in Children With Immunoglobulin A Vasculitis
Source: Oxford University Press journal article supplement (doi:10.1542/peds.2021-055884), 2022-08-17
Supplement: peds_2021055884supplementarydata.pdf [file peds_2021055884supplementarydata.pdf]

## Supplemental Information

**SUPPLEMENTAL TABLE 2** Images Obtained and Changes in Methemoglobin and Hemoglobin for Each Patient

| Case           | Imaging Tests Performed | Methemoglobin                |                            |                 | Hemoglobin                      |                                |                  |
|----------------|-------------------------|------------------------------|----------------------------|-----------------|---------------------------------|--------------------------------|------------------|
|                |                         | Before Dapsone Treatment (%) | During Treatment: Peak (%) | Time to Peak, d | Before Dapsone Treatment (g/dL) | During Treatment: Nadir (g/dL) | Time to Nadir, d |
| 1              | US                      | 0.7                          | 3.2                        | 44              | 13.5                            | 10.3                           | 65               |
| 2              | US, CT, EGD             | 0.3                          | 3.5                        | 14              | 9.6                             | 9.2                            | 7                |
| 3              | US                      | 0.6                          | 6.4                        | 70              | 13.7                            | 10.5                           | 62               |
| 4              | US                      | 0.3                          | 4.2                        | 5               | 15.1                            | 11.7                           | 79               |
| 5              | US, CT                  | 0.4                          | 5.0                        | 6               | 13.7                            | 11.0                           | 135              |
| 6              | US, EGD                 | 0.2                          | 3.1                        | 5               | 14.6                            | 12.5                           | 69               |
| 7              | US, EGD, SBCE           | 0.7                          | 5.0                        | 21              | 13.6                            | 9.4                            | 21               |
| Median (range) |                         | 0.4 (0.2 to 0.7)             | 4.2 (3.1 to 6.4)           | 14 (5 to 70)    | 13.7 (9.6 to 15.1)              | 10.5 (9.2 to 12.5)             | 65 (7 to 135)    |

US, ultrasound; CT, computed tomography; EGD, esophago-gastroduodenoscopy; SBCE, small-bowel capsule endoscopy; —, not applicable.
